# Supplementary material for: Trends in Veno‐Arterial Extracorporeal Life Support With and Without an Impella or Intra‐Aortic Balloon Pump for Cardiogenic Shock
Source: PubMed Central journal article supplement — J Am Heart Assoc. 2022 Dec 6;11(23):e025216. doi: 10.1161/JAHA.121.025216 (PMC9851440; doi:10.1161/jaha.121.025216), 2022-12-06
Supplement: JAH3-11-e025216-s001.pdf [file JAH3-11-e025216-s001.pdf]

## **SUPPLEMENTAL MATERIAL**

**Table S1. International Classification of Disease Codes**

| <b>ICD-10-CM or ICD-10-PCS</b>                              |                                                                                                                                                                        |
|-------------------------------------------------------------|------------------------------------------------------------------------------------------------------------------------------------------------------------------------|
| <b>Inclusion or Stratification Criteria</b>                 |                                                                                                                                                                        |
| Acute myocardial infarction                                 | I21.0x, I21.1x, I21.2x, I21.3x, and I21.4x                                                                                                                             |
| Cardiogenic shock                                           | R57.0                                                                                                                                                                  |
| ECMO                                                        | 5A15223, 5A1522F, 5A1522G, 5A1522H                                                                                                                                     |
| Intra-aortic balloon pump                                   | 5A02110, 5A02210                                                                                                                                                       |
| Impella                                                     | 5A0221D, 5A0211D                                                                                                                                                       |
| Placement of durable left ventricle assist device           | 02HA0QZ, 02HA3QZ, 02HA4QZ                                                                                                                                              |
| Heart transplant                                            | 02YA0Z0, 02YA0Z1, 02YA0Z2, 0BYM0Z0, 0BYM0Z1, 0BYM0Z2, 02YA0Z0, 02YA0Z1, 02YA0Z2, 02RK0JZ, 02RL0JZ, 02RK0JZ, 02RL0JZ, 02WA0JZ, 02WA0JZ, 02PA0JZ                         |
| <b>Baseline Characteristics</b>                             |                                                                                                                                                                        |
| Atrial Fibrillation/Flutter                                 | I48*                                                                                                                                                                   |
| Heart Failure                                               | I50*                                                                                                                                                                   |
| Hypertension                                                | I10*, I11, I12, I13, I16                                                                                                                                               |
| Coronary Artery Disease / Prior Acute Myocardial Infarction | I21.01, I21.02, I21.09, I21.11, I21.19, I21.21, I21.29, I21.3, I21.4, I21.9<br>I22.0, I22.1, I22.2, I22.8, I22.9<br>I25.1, I25.2, I25.7, I25.8<br>Z95.1, Z95.5, Z98.61 |
| Chronic Kidney Disease                                      | N18*                                                                                                                                                                   |

|                                       |                                                                              |
|---------------------------------------|------------------------------------------------------------------------------|
| Chronic Obstructive Pulmonary Disease | J40*-J45*, J47*                                                              |
| Diabetes Mellitus                     | E10*, E11*, E13*, E14*                                                       |
| Peripheral Artery Disease             | I70.1, I70.2, I70.3, I70.4, I70.5, I70.6, I70.7, I70.8, I70.9, I73.9, Z95.82 |
| Primary Pulmonary Hypertension        | I27.0                                                                        |
| TIA/Ischemic Stroke                   | G45, I60.0 - I60.9, I63, I67.81, I67.82, I67.89, I67.9, I97.81, I97.82       |
| Valvular Heart Disease                | I34, I35, I36, I37, I05, I06, I07, I08, I09.1, Z95.2, Z95.3, Z95.4           |
| Sleep Apnea                           | G47.30 – G47.39                                                              |
| Depression                            | F33*                                                                         |
| Anemia                                | D50, D51, D52, D53, D59, D63.0, D63.1, D63.8, D64.9                          |
| Thyroid Disease                       | E03, E05, E06, E07.9                                                         |
| Obesity                               | E66*                                                                         |

Abbreviations: ICD, International Classification of Diseases

**Table S2. Clinical outcomes By Impella and Intraortic Balloon Pump with VA-ECLS**

| Outcome                                                                                                                                                                                                                                                                                                                                                                 | Impella*                           |                                  | Intraortic Balloon Pump*           |                                  |
|-------------------------------------------------------------------------------------------------------------------------------------------------------------------------------------------------------------------------------------------------------------------------------------------------------------------------------------------------------------------------|------------------------------------|----------------------------------|------------------------------------|----------------------------------|
|                                                                                                                                                                                                                                                                                                                                                                         | Unadjusted Odds Ratio (95% CI)     | Adjusted Odds Ratio <sup>†</sup> | Unadjusted Odds Ratio (95% CI)     | Adjusted Odds Ratio <sup>†</sup> |
| In-hospital mortality                                                                                                                                                                                                                                                                                                                                                   |                                    |                                  |                                    |                                  |
| Overall                                                                                                                                                                                                                                                                                                                                                                 | 1.25 (0.98, 1.58)                  | 1.24 (0.98, 1.57)                | 0.93 (0.77, 1.12)                  | 0.84 (0.69, 1.03)                |
| AMI                                                                                                                                                                                                                                                                                                                                                                     | 1.30 (0.92, 1.84)                  | 1.36 (0.95, 1.94)                | 0.80 (0.60, 1.07)                  | 0.76 (0.56, 1.03)                |
| Non-AMI                                                                                                                                                                                                                                                                                                                                                                 | 1.00 (0.71, 1.41)                  | 1.01 (0.72, 1.43)                | 1.03 (0.81, 1.31)                  | 0.87 (0.67, 1.12)                |
| Discharge to Skilled nursing facility                                                                                                                                                                                                                                                                                                                                   | 0.65 (0.46, 0.92)                  | 0.62 (0.43, 0.89)                | 0.67 (0.52, 0.86)                  | 0.59 (0.45, 0.77)                |
|                                                                                                                                                                                                                                                                                                                                                                         | <b>Change in estimate (95% CI)</b> | <b>p-value</b>                   | <b>Change in estimate (95% CI)</b> | <b>p-value</b>                   |
| Length of stay (days)                                                                                                                                                                                                                                                                                                                                                   | -2.5 (-5.2, 0.1)                   | 0.06                             | 0.2 (-2.2, 2.6)                    | 0.84                             |
| <p>* Compared to VA-ECLS only<br/> <sup>†</sup> Adjusted for age, CCI, atrial fibrillation, hypertension, diabetes mellitus, chronic obstructive pulmonary disease, primary insurance, year, income quartile of patient's ZIP code, and hospital bed size<br/> Abbreviations: VA-ECLS, veno-arterial extra-corporeal life support; AMI, acute myocardial infarction</p> |                                    |                                  |                                    |                                  |

**Table S3. Outcomes in adults with cardiogenic shock and VA-ECLS by timing of second MCS device**

| Outcome                               | Second MCS device >24 hours<br>Prior to VA-ECLS* |                                     | Second MCS device >24 hours<br>After VA-ECLS* |                                     |
|---------------------------------------|--------------------------------------------------|-------------------------------------|-----------------------------------------------|-------------------------------------|
|                                       | Unadjusted<br>Odds Ratio<br>(95% CI)             | Adjusted Odds<br>Ratio <sup>†</sup> | Unadjusted<br>Odds Ratio<br>(95% CI)          | Adjusted Odds<br>Ratio <sup>†</sup> |
| In-hospital mortality                 | 1.15 (0.84, 1.59)                                | 1.13 (0.81, 1.59)                   | 1.05 (0.69, 1.60)                             | 1.04 (0.66, 1.64)                   |
| Discharge to Skilled nursing facility | 1.14 (0.74, 1.75)                                | 0.89 (0.52, 1.52)                   | 1.72 (0.92, 3.20)                             | 1.52 (0.79, 2.92)                   |
|                                       | Change in estimate (95% CI)                      | p-value                             | Change in estimate (95% CI)                   | p-value                             |
| Length of stay (days)                 | 8.7 (3.8, 13.5)                                  | <0.001                              | 6.7 (2.3, 11.2)                               | 0.003                               |

\* Compared to VA-ECLS + Second MCS on same hospital day  
<sup>†</sup> Adjusted for age, CCI, atrial fibrillation, hypertension, diabetes mellitus, chronic obstructive pulmonary disease, primary insurance, year, income quartile of patient's ZIP code, and hospital bed size  
Abbreviations: VA-ECLS, veno-arterial extra-corporeal life support; MCS, mechanical circulatory support

**Table S4. Sensitivity analysis including only those undergoing second MCS within two hospital days of VA-ECLS**

| Outcome                               | Impella*                       |                                  | Intraortic Balloon Pump*       |                                  |
|---------------------------------------|--------------------------------|----------------------------------|--------------------------------|----------------------------------|
|                                       | Unadjusted Odds Ratio (95% CI) | Adjusted Odds Ratio <sup>†</sup> | Unadjusted Odds Ratio (95% CI) | Adjusted Odds Ratio <sup>†</sup> |
| In-hospital mortality                 |                                |                                  |                                |                                  |
| Overall                               | 1.29 (0.98, 1.69)              | 1.27 (0.96, 1.68)                | 0.85 (0.68, 1.08)              | 0.75 (0.59, 0.97)                |
| AMI                                   | 1.19 (0.81, 1.76)              | 1.21 (0.81, 1.82)                | 0.75 (0.53, 1.06)              | 0.71 (0.48, 1.03)                |
| Non-AMI                               | 0.83 (0.55, 1.28)              | 1.21 (0.78, 1.88)                | 1.14 (0.84, 1.53)              | 0.75 (0.55, 1.02)                |
| Discharge to skilled nursing facility | 0.55 (0.36, 0.85)              | 0.54 (0.34, 0.84)                | 0.80 (0.59, 1.08)              | 0.73 (0.54, 1.00)                |
|                                       | Change in estimate (95% CI)    | p-value                          | Change in estimate (95% CI)    | p-value                          |
| Length of stay (days)                 | -6.9 (-9.7, -4.1)              | <0.001                           | -0.7 (-3.2, 1.8)               | 0.58                             |

\*Compared to VA-ECLS only  
<sup>†</sup>Adjusted for age, CCI, atrial fibrillation, hypertension, diabetes mellitus, chronic obstructive pulmonary disease, primary insurance, year, income quartile of patient's ZIP code, and hospital bed size  
Abbreviations: VA-ECLS, veno-arterial extra-corporeal life support; AMI, acute myocardial infarction

**Table S5. Sensitivity analysis of those with cardiogenic shock and VA-ECLS complicating acute myocardial infarction**

| Outcome                                                                                                                                                                                                                                                                                                                               | Impella*                       |                                  | Intraortic Balloon Pump*       |                                  |
|---------------------------------------------------------------------------------------------------------------------------------------------------------------------------------------------------------------------------------------------------------------------------------------------------------------------------------------|--------------------------------|----------------------------------|--------------------------------|----------------------------------|
|                                                                                                                                                                                                                                                                                                                                       | Unadjusted Odds Ratio (95% CI) | Adjusted Odds Ratio <sup>†</sup> | Unadjusted Odds Ratio (95% CI) | Adjusted Odds Ratio <sup>†</sup> |
| In-hospital mortality                                                                                                                                                                                                                                                                                                                 | 1.39 (0.96, 2.02)              | 1.52 (1.04, 2.21)                | 0.85 (0.62, 1.17)              | 0.80 (0.57, 1.12)                |
| Discharge to Skilled Nursing Facility                                                                                                                                                                                                                                                                                                 | 0.61 (0.35, 1.07)              | 0.62 (0.32, 1.20)                | 0.65 (0.40, 1.04)              | 0.54 (0.31, 0.94)                |
|                                                                                                                                                                                                                                                                                                                                       | Change in estimate             | p-value                          | Change in estimate             | p-value                          |
| Length of stay (days)                                                                                                                                                                                                                                                                                                                 | -6.9 (-9.7, -4.1)              | <0.001                           | -2.1 (-5.7, 1.6)               | 0.26                             |
| <p>* Compared to VA-ECLS only<br/> <sup>†</sup> Adjusted for age, CCI, atrial fibrillation, hypertension, diabetes mellitus, chronic obstructive pulmonary disease, primary insurance, year, income quartile of patient's ZIP code, and hospital bed size<br/> Abbreviations: VA-ECLS, veno-arterial extra-corporeal life support</p> |                                |                                  |                                |                                  |
